# Supplementary material for: Yap suppresses T-cell function and infiltration in the tumor microenvironment
Source: PubMed Central journal article supplement (PMC6980695; doi:10.1371/journal.pbio.3000591), 2020-01-13
Supplement: pbio.3000591.s015.pdf [file pbio.3000591.s015.pdf]

**A**  $\alpha$ -Yap immunoblot (Fig 1A)

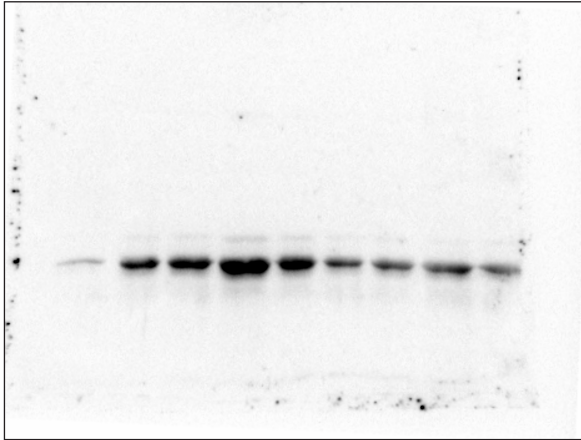

No stim  
15-min  
30-min  
2-h  
6-h  
12-h  
24-h  
X  
X

**B**  $\alpha$ -Yap immunoblot (Fig 1B)

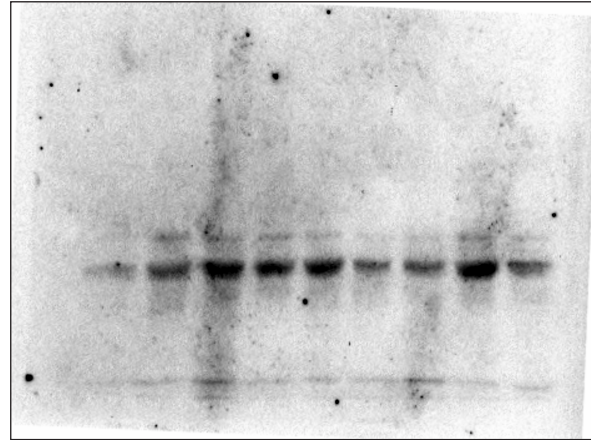

No stim  
15-min  
30-min  
2-h  
6-h  
12-h  
24-h  
X  
X

**C**  $\alpha$ -GAPDH immunoblot (Fig 1A)

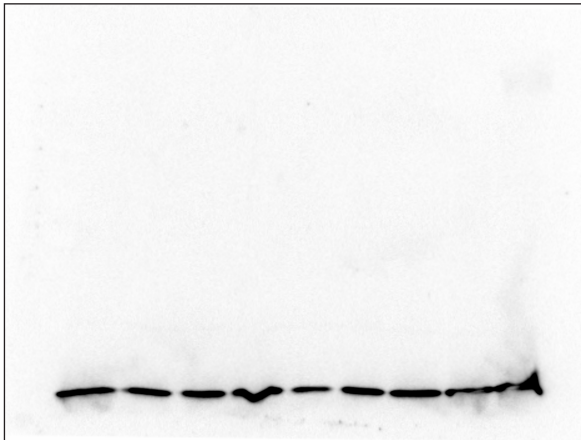

No stim  
15-min  
30-min  
2-h  
6-h  
12-h  
24-h  
X  
X

**D**  $\alpha$ -GAPDH immunoblot (Fig 1B)

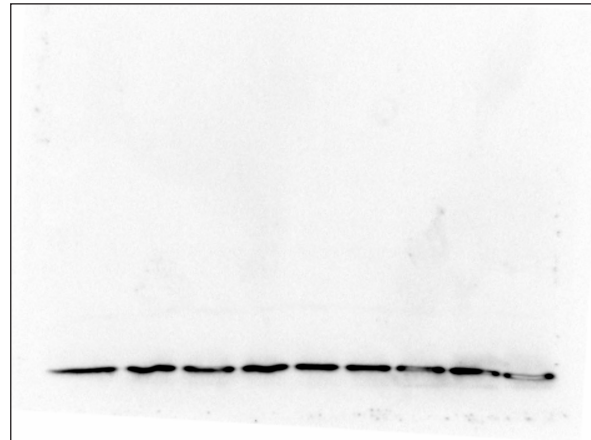

No stim  
15-min  
30-min  
2-h  
6-h  
12-h  
24-h  
X  
X

Original Immunoblot images from Fig 1A-B were captured using a Bio-Rad ChemiDoc system.
