# Supplementary material for: Yap suppresses T-cell function and infiltration in the tumor microenvironment
Source: PLoS Biol. 2020 Jan 13;18(1):e3000591. doi: 10.1371/journal.pbio.3000591 (PMC6980695; doi:10.1371/journal.pbio.3000591)
Supplement: S3 Data — Each tab includes data for the noted panels in Fig 3. (XLSX) [file pbio.3000591.s011.xlsx]

## Sheet: Fig 3A
Fig 3A data. Total cell numbers from different developmental stages
		CD8+ SP								CD4+ SP								DP (CD4+ CD8+)								DN (CD4- CD8-)
WT		169730	124759	180428	167270	137379	144485	156135		378711	338542	286781	320260	150965	348929	766584		15172727	15080857	13886685	15414755	6848762	12321618	21965467		1190559	794474	982384	765658	344707	692007	950530
Yap-cKO		234668	200789	121086	145089	130111	115458			1116009	852574	338035	384027	364768	426375			22171218	23544258	12429854	12030181	17535627	13066152			1193054	1264102	609649	584139	1050393	611756

## Sheet: Fig 3B
Fig 3B data. percentage of cells TCRb positive selection stages
	WT								Yap-cKO
TCRb+CD69- mature	1.38	1.12	1.28	1.34	1.58	1.57	1.42		1.4	1.57	1.25	1.56	0.99	1.23
TCRb+CD69+ post-pos. sel.	2.37	2.56	1.86	2.42	2.99	2.83	3.59		2.94	3.47	3.46	3.88	2.2	3.71
TCRb-CD69+ post-TCR	4.81	4.86	4.7	4.62	4.7	4.46	5.14		5.11	5.2	5.12	4.96	5.39	5.45
TCRb-CD69- pre-sel.	89.6	89.7	90.3	89.6	88.7	89.4	87.9		88.7	88	88.3	87.7	89.5	88

## Sheet: Fig 3C
Fig 3C data. Percentage of CD69+/MHCI- cells
YAP-cKO	WT
17.3	18.2
15.1	23
24.9	22.1
23.2	26.1
26.4	27.2
20.2	18.7
	20.8

## Sheet: Fig 3D
Fig 3D data. Percentage of CD69+/MHCI+ cells
YAP-cKO	WT
45.1	43.9
47.3	46.3
46.4	39.2
43.8	39.3
44.4	41
52.8	43.3
	47.5

## Sheet: Fig 3E
Fig 3E data. Percentage of CD69- MHCI+ cells
YAP-cKO	WT
35.9	33.3
36.3	27.4
26.3	30.4
30.8	26.3
23.3	25.4
25.5	34.6
	29.4

## Sheet: Fig 3F
Fig 3F data. Percentage of Nur77+ of cells
		DP							CD4							CD8
WT		1.44	1.22	1.18	1.12	1.94	1.28	1.11	11.7	12.4	9.02	9.42	9.76	8.28	7.38	13.6	8.83	16.8	21.9	10.5	10.1	11.2
YAP-cKO		1.02	0.97	1.15	1.21	1.25	1.1		4.39	6.08	7.14	7.27	9.66	7.11		7.53	8.71	10.6	10.6	15	8.03
